# Supplementary material for: Effects of γ-ray irradiation on the molecular structure of collagen in different product forms
Source: Royal Society of Chemistry journal article supplement (doi:10.1039/d2nj04259b), 2023-01-01
Supplement: d2nj04259b1.pdf [file d2nj04259b1.pdf]

## Supplementary Material

### Effects of $\gamma$ -ray irradiation on the molecular structure of collagen in different product forms

Chengzhi Xu<sup>1</sup>, Wenjing Hu<sup>1</sup>, Xiao Xiao<sup>2</sup>, Lian Zhu<sup>1</sup>, Juntao Zhang<sup>1</sup>, Benmei Wei<sup>1</sup>, Haibo Wang<sup>1,\*</sup>

<sup>1</sup> School of Chemistry and Environmental Engineering, Wuhan Polytechnic University, Wuhan, Hubei, China

<sup>2</sup> School of Food Science and Engineering, Wuhan Polytechnic University, Wuhan, Hubei, China

\*To whom correspondence should be addressed: wanghaibo@whpu.edu.cn

#### 1. Characterization of changes in collagen structure by circular dichroism

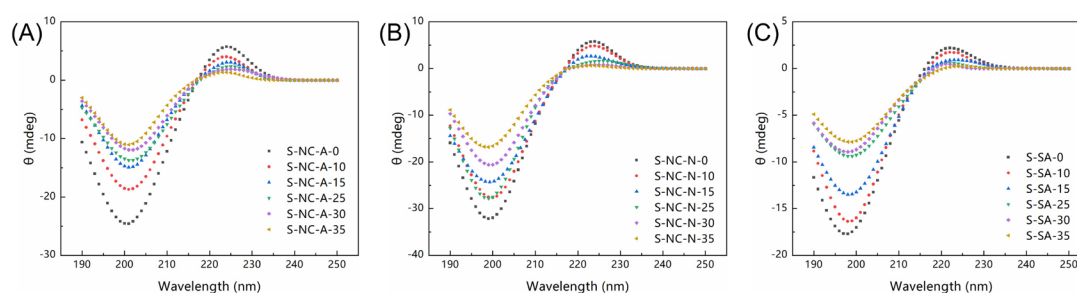

**Figure S1.** CD wavelength scanning curve of collagen sponge samples treated with different irradiation doses

#### 2. Characterization of changes in collagen thermal stability by DSC

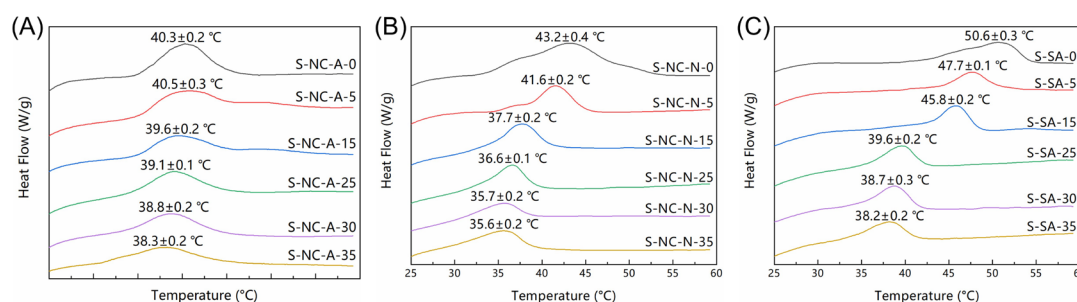

**Figure S2.** DSC signal curves of collagen sponge samples treated with different irradiation doses

### 3. FTIR analysis results of freeze-dried sponge of collagen PBS solution and collagen self-assembled gel treated with different doses of irradiation.

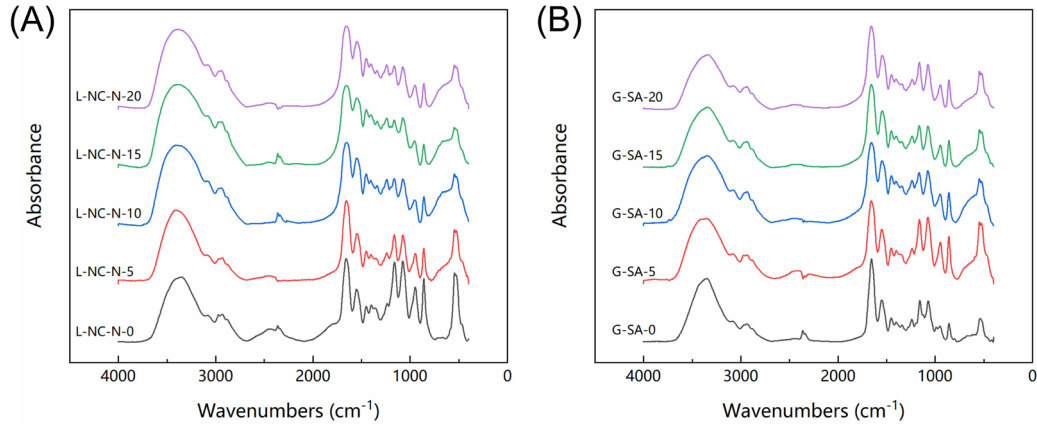

**Figure S3.** FTIR spectra of freeze-dried sponge of collagen PBS solution (A) and collagen self-assembled gel (B) treated with different doses of irradiation.

**Table S1.** Peak parameters obtained by deconvolution of the amide A and amide B bands in the FTIR spectra

| Sample    | Peak | Center | Area   | Amplitude | Width | Sample  | Peak | Center | Area   | Amplitude | Width |
|-----------|------|--------|--------|-----------|-------|---------|------|--------|--------|-----------|-------|
| L-NC-N-0  | 1    | 3527.2 | 43.67  | 0.249     | 164.6 | G-SA-0  | 1    | 3524.5 | 24.47  | 0.149     | 154.6 |
|           | 2    | 3395.5 | 119.27 | 0.487     | 230.1 |         | 2    | 3381.8 | 139.74 | 0.562     | 233.6 |
|           | 3    | 3256.5 | 113.72 | 0.375     | 285.2 |         | 3    | 3242.9 | 86.60  | 0.251     | 323.9 |
|           | 4    | 3068.1 | 8.17   | 0.106     | 72.3  |         | 4    | 3069.0 | 5.27   | 0.073     | 67.9  |
|           | 5    | 2947.4 | 24.82  | 0.214     | 109.0 |         | 5    | 2940.8 | 14.96  | 0.135     | 103.7 |
|           | 6    | 2865.1 | 6.35   | 0.089     | 67.1  |         | 6    | 2863.9 | 2.34   | 0.043     | 51.1  |
| L-NC-N-5  | 1    | 3555.4 | 24.92  | 0.190     | 123.5 | G-SA-5  | 1    | 3547.4 | 27.13  | 0.186     | 136.7 |
|           | 2    | 3451.8 | 92.92  | 0.459     | 190.2 |         | 2    | 3445.4 | 72.90  | 0.348     | 197.0 |
|           | 3    | 3299.6 | 188.61 | 0.617     | 287.0 |         | 3    | 3297.5 | 168.17 | 0.550     | 287.0 |
|           | 4    | 3067.3 | 11.23  | 0.126     | 83.8  |         | 4    | 3068.8 | 10.42  | 0.125     | 78.5  |
|           | 5    | 2945.0 | 22.60  | 0.191     | 111.2 |         | 5    | 2950.6 | 21.84  | 0.200     | 102.6 |
|           | 6    | 2860.8 | 3.03   | 0.054     | 52.4  |         | 6    | 2868.4 | 5.94   | 0.082     | 68.0  |
| L-NC-N-10 | 1    | 3564.4 | 42.16  | 0.298     | 132.9 | G-SA-10 | 1    | 3540.8 | 47.58  | 0.257     | 174.1 |
|           | 2    | 3457.0 | 111.53 | 0.519     | 201.7 |         | 2    | 3417.0 | 84.11  | 0.329     | 240.2 |
|           | 3    | 3275.6 | 252.83 | 0.747     | 317.9 |         | 3    | 3277.6 | 188.96 | 0.546     | 325.3 |
|           | 4    | 3065.0 | 14.05  | 0.168     | 78.8  |         | 4    | 3064.7 | 9.25   | 0.124     | 70.1  |
|           | 5    | 2947.2 | 32.62  | 0.279     | 109.7 |         | 5    | 2943.5 | 28.76  | 0.245     | 110.1 |
|           | 6    | 2865.4 | 5.56   | 0.089     | 58.7  |         | 6    | 2863.0 | 3.84   | 0.072     | 49.8  |
| L-NC-N-15 | 1    | 3570.8 | 43.62  | 0.319     | 128.6 | G-SA-15 | 1    | 3536.7 | 37.33  | 0.224     | 156.7 |
|           | 2    | 3457.3 | 122.15 | 0.562     | 204.3 |         | 2    | 3411.2 | 87.48  | 0.368     | 223.3 |
|           | 3    | 3266.9 | 257.80 | 0.751     | 322.4 |         | 3    | 3268.2 | 144.77 | 0.471     | 288.7 |
|           | 4    | 3062.9 | 18.45  | 0.183     | 94.6  |         | 4    | 3065.8 | 9.54   | 0.123     | 72.8  |
|           | 5    | 2945.3 | 35.73  | 0.324     | 103.5 |         | 5    | 2946.3 | 26.93  | 0.223     | 113.2 |

| Sample    | Peak | Center | Area   | Amplitude | Width | Sample  | Peak | Center | Area   | Amplitude | Width |
|-----------|------|--------|--------|-----------|-------|---------|------|--------|--------|-----------|-------|
|           | 6    | 2867.3 | 7.57   | 0.119     | 60.0  |         | 6    | 2863.3 | 3.03   | 0.058     | 48.7  |
| L-NC-N-20 | 1    | 3562.6 | 40.97  | 0.291     | 132.4 | G-SA-20 | 1    | 3537.8 | 29.24  | 0.188     | 146.0 |
|           | 2    | 3452.8 | 110.78 | 0.519     | 200.4 |         | 2    | 3413.8 | 77.23  | 0.337     | 215.2 |
|           | 3    | 3274.1 | 239.97 | 0.725     | 310.9 |         | 3    | 3272.8 | 130.78 | 0.435     | 282.4 |
|           | 4    | 3064.1 | 15.33  | 0.176     | 82.0  |         | 4    | 3063.8 | 9.74   | 0.118     | 77.4  |
|           | 5    | 2946.9 | 33.61  | 0.289     | 109.3 |         | 5    | 2947.2 | 22.30  | 0.195     | 107.6 |
|           | 6    | 2864.4 | 4.79   | 0.084     | 53.7  |         | 6    | 2863.2 | 3.41   | 0.058     | 55.0  |

**Table S2.** Peak parameters obtained by deconvolution of the amide I and amide II bands in the FTIR spectra

| Sample    | Peak | Center | Area  | Amplitude | Width | Sample  | Peak | Center | Area  | Amplitude | Width |
|-----------|------|--------|-------|-----------|-------|---------|------|--------|-------|-----------|-------|
| L-NC-N-0  | 1    | 1667.2 | 43.77 | 0.668     | 61.6  | G-SA-0  | 1    | 1658.7 | 53.57 | 0.736     | 68.4  |
|           | 2    | 1633.5 | 16.09 | 0.330     | 45.8  |         | 2    | 1645.9 | 9.83  | 0.190     | 48.6  |
|           | 3    | 1550.7 | 24.60 | 0.407     | 56.8  |         | 3    | 1550.7 | 22.59 | 0.388     | 54.7  |
|           | 4    | 1517.6 | 1.90  | 0.069     | 25.8  |         | 4    | 1516.8 | 1.71  | 0.065     | 24.7  |
| L-NC-N-5  | 1    | 1656.9 | 69.88 | 0.825     | 79.5  | G-SA-5  | 1    | 1658.2 | 64.79 | 0.786     | 77.5  |
|           | 2    | 1631.3 | 1.67  | 0.064     | 24.4  |         | 2    | 1629.8 | 1.96  | 0.079     | 23.5  |
|           | 3    | 1550.3 | 21.33 | 0.397     | 50.4  |         | 3    | 1551.7 | 22.10 | 0.423     | 49.1  |
|           | 4    | 1519.5 | 4.23  | 0.129     | 30.8  |         | 4    | 1520.1 | 4.31  | 0.132     | 30.7  |
| L-NC-N-10 | 1    | 1664.4 | 72.21 | 0.736     | 92.2  | G-SA-10 | 1    | 1661.0 | 68.37 | 0.728     | 88.3  |
|           | 2    | 1623.5 | 7.02  | 0.167     | 39.5  |         | 2    | 1627.3 | 2.89  | 0.089     | 30.4  |
|           | 3    | 1552.7 | 27.62 | 0.461     | 56.2  |         | 3    | 1550.0 | 24.43 | 0.426     | 53.9  |
|           | 4    | 1518.7 | 5.46  | 0.166     | 30.8  |         | 4    | 1516.9 | 4.63  | 0.146     | 29.8  |
| L-NC-N-15 | 1    | 1672.0 | 63.48 | 0.663     | 90.0  | G-SA-15 | 1    | 1660.1 | 74.87 | 0.825     | 85.3  |
|           | 2    | 1623.6 | 12.02 | 0.231     | 48.8  |         | 2    | 1630.7 | 2.29  | 0.080     | 26.9  |
|           | 3    | 1555.6 | 26.44 | 0.398     | 62.5  |         | 3    | 1549.4 | 24.27 | 0.450     | 50.7  |
|           | 4    | 1518.4 | 5.52  | 0.157     | 33.0  |         | 4    | 1517.2 | 5.50  | 0.169     | 30.5  |
| L-NC-N-20 | 1    | 1667.6 | 66.12 | 0.720     | 86.3  | G-SA-20 | 1    | 1660.6 | 72.71 | 0.806     | 84.8  |
|           | 2    | 1623.8 | 10.64 | 0.227     | 44.0  |         | 2    | 1633.3 | 2.37  | 0.076     | 29.2  |
|           | 3    | 1554.2 | 29.07 | 0.452     | 60.4  |         | 3    | 1549.2 | 21.38 | 0.406     | 49.5  |
|           | 4    | 1519.1 | 5.76  | 0.167     | 32.4  |         | 4    | 1517.6 | 5.98  | 0.174     | 32.2  |

**4. Texture analysis results of freeze-dried sponge of collagen PBS solution and collagen self-assembled gel treated with different doses of irradiation.**

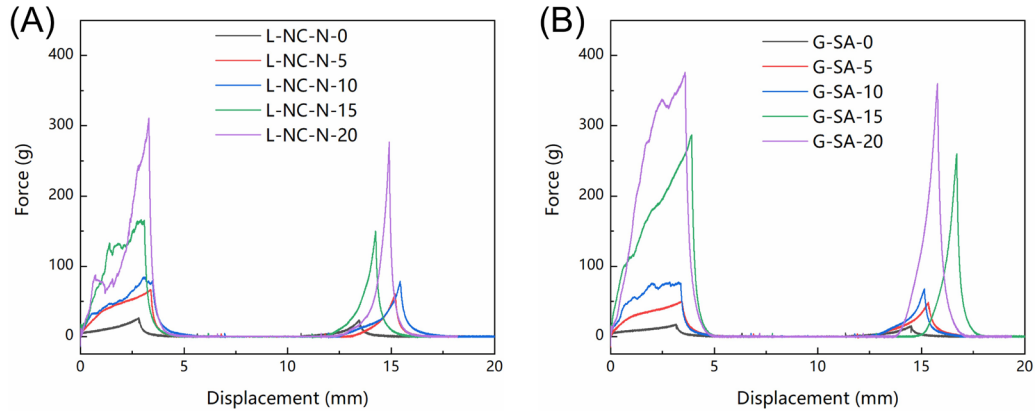

**Figure S4.** Texture analysis of the lyophilized sponge part samples of collagen PBS solution (A) and collagen self-assembly gel (B) irradiated with different doses

**Table S3.** Texture parameters of collagen PBS solution (A) and collagen self-assembly gel (B) lyophilized product sponge samples treated with different doses of irradiation ( $n = 3$ ,  $\bar{x} \pm s$ ).

| Sample |            | Different doses/kGy     |                          |                          |                           |                           |
|--------|------------|-------------------------|--------------------------|--------------------------|---------------------------|---------------------------|
|        |            | 0                       | 5                        | 10                       | 15                        | 20                        |
| L-NC-N | Hardness   | 19.25±1.57 <sup>c</sup> | 64.26±4.92 <sup>bc</sup> | 87.71±5.55 <sup>bc</sup> | 121.27±24.57 <sup>b</sup> | 247.72±42.7 <sup>a</sup>  |
|        | Elasticity | 0.81±0.02 <sup>a</sup>  | 0.63±0.02 <sup>b</sup>   | 0.78±0.03 <sup>a</sup>   | 0.77±0.02 <sup>a</sup>    | 0.76±0.02 <sup>a</sup>    |
|        | Resilience | 0.19±0.01 <sup>a</sup>  | 0.11±0.01 <sup>b</sup>   | 0.14±0.01 <sup>b</sup>   | 0.13±0.01 <sup>ab</sup>   | 0.12±0.01 <sup>b</sup>    |
| G-SA   | Hardness   | 23.87±1.79 <sup>c</sup> | 42.10±4.97 <sup>c</sup>  | 60.03±9.79 <sup>c</sup>  | 225.37±31.78 <sup>b</sup> | 326.57±26.93 <sup>b</sup> |
|        | Elasticity | 0.80±0.02 <sup>a</sup>  | 0.78±0.02 <sup>a</sup>   | 0.77±0.01 <sup>a</sup>   | 0.58±0.04 <sup>a</sup>    | 0.57±0.02 <sup>b</sup>    |
|        | Resilience | 0.17±0.03 <sup>a</sup>  | 0.15±0.01 <sup>a</sup>   | 0.11±0.01 <sup>b</sup>   | 0.10±0.01 <sup>b</sup>    | 0.10±0.01 <sup>b</sup>    |

**Note:** The above significance analysis compares the compression indexes of L-NC-A and G-SA separately; a, b, and c indicate a significant difference between the two groups of sponge tensile indexes under different pressures,  $\alpha = 0.05$ ;  $n$  represents three parallel experiments;  $\bar{x}$  represents the mean;  $s$  represents the standard deviation.
